# Supplementary material for: ET cool home: innovative educational activities on evapotranspiration and urban heat
Source: Copernicus journal article supplement (doi:10.5194/hess-28-1515-2024), 2024-04-03
Supplement: Supplementary file 1 [file hess-28-1515-2024-supplement.zip]

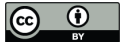

*Supplement of*

**ET cool home: innovative educational activities on  
evapotranspiration and urban heat**

**Kyle Blount et al.**

*Correspondence to:* Kyle Blount (wblou2@uis.edu)

- [hess-28-1515-2024-supplement-title-page.pdf](#)
- [S1\\_instructor-notes.pdf](#)
- [S2\\_unit-conversions\\_dimensional-analysis.pdf](#)
- [S3\\_calculation-spreadsheet.xlsx](#)

The copyright of individual parts of the supplement might differ from the article licence.
