# Supplementary material for: ET cool home: innovative educational activities on evapotranspiration and urban heat
Source: Copernicus journal article supplement (doi:10.5194/hess-28-1515-2024), 2024-04-03
Supplement: Supplementary file 4 [file hess-28-1515-2024-supplement.zip]

Archive with 4 entries (4 files):
- S2_unit-conversions_dimensional-analysis.pdf
- S1_instructor-notes.pdf
- hess-28-1515-2024-supplement-title-page.pdf
- S3_calculation-spreadsheet.xlsx
